# Supplementary material for: Dose adjustment of paroxetine based on CYP2D6 activity score inferred metabolizer status in Chinese Han patients with depressive or anxiety disorders: a prospective study and cross-ethnic meta-analysis
Source: PubMed Central journal article supplement — eBioMedicine. 2024 May 21;104:105165. doi: 10.1016/j.ebiom.2024.105165 (PMC11141156; doi:10.1016/j.ebiom.2024.105165), 2024-05-21
Supplement: mmc3.pdf [file mmc3.pdf]

**Members of the Precision Medicine to Enhance Depression and Anxiety  
Outcome (PMEDA) Consortium**

| <b>First Name</b> | <b>Surname</b> | <b>Affiliation</b>                                                                                                                                                                                                                                  |
|-------------------|----------------|-----------------------------------------------------------------------------------------------------------------------------------------------------------------------------------------------------------------------------------------------------|
| Weihua            | Yue**          | Peking University Sixth Hospital, Peking University Institute of Mental Health, NHC Key Laboratory of Mental Health (Peking University), National Clinical Research Center for Mental Disorders (Peking University Sixth Hospital), Beijing, China. |
| Yundan            | Liao           | Peking University Sixth Hospital, Peking University Institute of Mental Health, NHC Key Laboratory of Mental Health (Peking University), National Clinical Research Center for Mental Disorders (Peking University Sixth Hospital), Beijing, China. |
| Jing              | Guo            | Peking University Sixth Hospital, Peking University Institute of Mental Health, NHC Key Laboratory of Mental Health (Peking University), National Clinical Research Center for Mental Disorders (Peking University Sixth Hospital), Beijing, China. |
| Zhewei            | Kang           | Peking University Sixth Hospital, Peking University Institute of Mental Health, NHC Key Laboratory of Mental Health (Peking University), National Clinical Research Center for Mental Disorders (Peking University Sixth Hospital), Beijing, China. |
| Yaoyao            | Sun            | Peking University Sixth Hospital, Peking University Institute of Mental Health, NHC Key Laboratory of Mental Health (Peking University), National Clinical Research Center for Mental Disorders (Peking University Sixth Hospital), Beijing, China. |
| Yuyan             | Zhang          | Peking University Sixth Hospital, Peking University Institute of Mental Health, NHC Key Laboratory of Mental Health (Peking University), National Clinical Research Center for Mental Disorders (Peking University Sixth Hospital), Beijing, China  |
| Zhongchun         | Liu*           | Department of Psychiatry, Renmin Hospital of Wuhan University, Wuhan 430060, Hubei Province, China.                                                                                                                                                 |
| Hanping           | Bai            | Department of Psychiatry, Renmin Hospital of Wuhan University, Wuhan Hubei Province, 430060, China                                                                                                                                                  |

|           |        |                                                                                                                                                                                                         |
|-----------|--------|---------------------------------------------------------------------------------------------------------------------------------------------------------------------------------------------------------|
| Maolin    | Hu     | Department of Psychiatry, Renmin Hospital of Wuhan University, Wuhan Hubei Province, 430060, China                                                                                                      |
| Yunshu    | Zhang* | <sup>1</sup> Hebei Provincial Mental Health Center<br><sup>2</sup> Hebei Key Laboratory of Major Mental and Behavioral Disorders<br><sup>3</sup> The Sixth Clinical Medical College of Hebei University |
| Bing      | Li     | Hebei Provincial Mental Health Center, Hebei Key Laboratory of Major Mental and Behavioral Disorders, The Sixth Clinical Medical College of Hebei University, Baoding, Hebei, China                     |
| Jingshan  | Han    | Hebei Provincial Mental Health Center, Hebei Key Laboratory of Major Mental and Behavioral Disorders, The Sixth Clinical Medical College of Hebei University, Baoding, Hebei, China                     |
| Li        | Kuang* | Department of Psychiatry, The First Affiliated Hospital of Chongqing Medical University, Chongqing, China                                                                                               |
| Jiaojiao  | Xiang  | Department of Psychiatry, The First Affiliated Hospital of Chongqing Medical University, Chongqing, China                                                                                               |
| Ruhong    | Jiang  | Mental Health Center, University-Town Hospital of Chongqing Medical University, Chongqing, China                                                                                                        |
| Yong      | Zhang* | Tianjin Anding Hospital, Tianjin, China                                                                                                                                                                 |
| Jian      | Zhang  | Tianjin Anding Hospital, Tianjin, China                                                                                                                                                                 |
| Yuxiang   | He     | Tianjin Anding Hospital, Tianjin, China                                                                                                                                                                 |
| Lidong    | Sun*   | The Fourth People's Hospital of Ordos, Ordos, Inner Mongolia, China                                                                                                                                     |
| Huailiang | Yang   | The Fourth People's Hospital of Ordos, Ordos, Inner Mongolia, China                                                                                                                                     |
| Guifang   | Liu    | The Fourth People's Hospital of Ordos, Ordos, Inner Mongolia, China                                                                                                                                     |
| Changbin  | Cao*   | Weihai Mental Health Center, Weihai, Shandong, China                                                                                                                                                    |
| Lili      | Peng   | Weihai Mental Health Center, Weihai, Shandong, China                                                                                                                                                    |
| Hui       | Yu     | Weihai Mental Health Center, Weihai, Shandong, China                                                                                                                                                    |
| Anzhen    | Wang*  | Hefei Fourth People's Hospital, Hefei, Anhui, China                                                                                                                                                     |
| Xialong   | Cheng  | Hefei Fourth People's Hospital, Hefei, Anhui, China                                                                                                                                                     |
| Wenmei    | Fang   | Hefei Fourth People's Hospital, Hefei, Anhui, China                                                                                                                                                     |
| Saizheng  | Weng*  | Fuzhou Neuropsychiatric Hospital, Fuzhou, Fujian, China                                                                                                                                                 |
| Rongyan   | Zheng  | Fuzhou Neuropsychiatric Hospital, Fuzhou, Fujian, China                                                                                                                                                 |
| Ruiqian   | Lin    | Fuzhou Neuropsychiatric Hospital, Fuzhou, Fujian, China                                                                                                                                                 |

|          |       |                                                                                                                                                                                                                                                                                                                                                        |
|----------|-------|--------------------------------------------------------------------------------------------------------------------------------------------------------------------------------------------------------------------------------------------------------------------------------------------------------------------------------------------------------|
| Ai-hua   | Ni*   | Department of Clinical Psychology, Hebei General Hospital, Shijiazhuang, Hebei province, 050051, China                                                                                                                                                                                                                                                 |
| Xiao-yan | Zhai  | Department of Clinical Psychology, Hebei General Hospital, Shijiazhuang, Hebei, 050051, China                                                                                                                                                                                                                                                          |
| Jiyang   | Pan*  | Department of Psychiatry, The First Affiliated Hospital of Jinan University, Guangzhou, Guangdong, China                                                                                                                                                                                                                                               |
| Rui      | Tang  | Department of Psychiatry, The First Affiliated Hospital of Jinan University, Guangzhou, Guangdong, China                                                                                                                                                                                                                                               |
| Fangyi   | Deng  | Department of Psychiatry, The First Affiliated Hospital of Jinan University, Guangzhou, Guangdong, China                                                                                                                                                                                                                                               |
| Kai      | Wang* | <sup>1</sup> Department of Neurology, the First Affiliated Hospital of Anhui Medical University, Hefei, Anhui Province, China<br><sup>2</sup> Institute of Artificial Intelligence, Hefei Comprehensive National Science Center, Hefei, China                                                                                                          |
| Chunyan  | Zhu   | <sup>1</sup> School of Mental Health and Psychological Sciences, Anhui Medical University, Hefei, Anhui Province, China<br><sup>2</sup> Anhui Province Key Laboratory of Cognition and Neuropsychiatric Disorders, Hefei, China<br><sup>3</sup> Collaborative Innovation Center of Neuropsychiatric Disorders and Mental Health, Anhui Province, China |
| Ting     | Zhang | Department of Psychiatry, the First Affiliated Hospital of Anhui Medical University, Hefei, Anhui Province, China                                                                                                                                                                                                                                      |
| Zhi-yu   | Chen* | Affiliated Mental Health Center & Hangzhou Seventh People's Hospital, Zhejiang University, Hangzhou, Zhejiang, China                                                                                                                                                                                                                                   |
| Yan      | Yang  | Affiliated Mental Health Center & Hangzhou Seventh People's Hospital, Zhejiang University, Hangzhou, Zhejiang, China                                                                                                                                                                                                                                   |
| Ji-ting  | Geng  | Affiliated Mental Health Center & Hangzhou Seventh People's Hospital, Zhejiang University, Hangzhou, Zhejiang, China                                                                                                                                                                                                                                   |
| Hua-ning | Wang* | The First Affiliated Hospital of Air Force Medical University, Xi'an, Shaanxi, China                                                                                                                                                                                                                                                                   |
| Di       | Wu    | The First Affiliated Hospital of Air Force Medical University, Xi'an, Shaanxi, China                                                                                                                                                                                                                                                                   |

|          |        |                                                                                                 |
|----------|--------|-------------------------------------------------------------------------------------------------|
| Yi-huan  | Chen   | The First Affiliated Hospital of Air Force Medical University, Xi'an, Shaanxi, China            |
| Jun      | Wang*  | The Affiliated Mental Health Center of Jiangnan University, Wuxi, Jiangsu, 214151, China        |
| Yifan    | Sun    | The Affiliated Mental Health Center of Jiangnan University, Wuxi, Jiangsu, 214151, China        |
| Jian-min | Zhang* | Tongde Hospital of Zhejiang Province (Zhejiang Mental Health Center), Hangzhou, Zhejiang, China |
| Yong-can | Zhou   | Tongde Hospital of Zhejiang Province (Zhejiang Mental Health Center), Hangzhou, Zhejiang, China |
| Wei-xin  | Wang   | Tongde Hospital of Zhejiang Province (Zhejiang Mental Health Center), Hangzhou, Zhejiang, China |
| Yutao    | Sun*   | Department of Psychiatry, The Fifth Hospital of Tangshan, Tangshan, Hebei, China.               |

\*\* Leading Principal Investigator

\* Sub-principal Investigator
